# Supplementary material for: The Impact of Binge Drinking on Mortality and Liver Disease in the Swiss HIV Cohort Study
Source: PubMed Central journal article supplement (PMC7830571; doi:10.3390/jcm10020295), 2021-01-14
Supplement: jcm-10-00295-s001.pdf [file jcm-10-00295-s001.pdf]

## Supplementary Material

**Table S1.** Alcohol Use Disorders Identification Test Consumption Score (AUDIT-C)

| Item                                                                   | Answer              | Score |
|------------------------------------------------------------------------|---------------------|-------|
| 1) How often did you consume alcoholic drinks?                         | Never               | 0     |
|                                                                        | Monthly or less     | 1     |
|                                                                        | 2-4 times per month | 2     |
|                                                                        | 2-3 times per week  | 3     |
|                                                                        | ≥4 times per week   | 4     |
| 2) How many drinks <sup>1</sup> did you consume on a typical occasion? | 1 or 2 drinks       | 0     |
|                                                                        | 3-4 drinks          | 1     |
|                                                                        | 5-6 drinks          | 2     |
|                                                                        | 7-9 drinks          | 3     |
|                                                                        | 10 drinks or more   | 4     |
| 3) How frequently did you drink 6 or more alcohol drinks?              | Never               | 0     |
|                                                                        | Less than monthly   | 1     |
|                                                                        | Monthly             | 2     |
|                                                                        | Weekly              | 3     |
|                                                                        | (Almost) daily      | 4     |

The AUDIT-C score is a clinical screening tool to detect alcohol misuse. A total score of ≥3 for women and ≥4 for men is considered as potentially hazardous drinking.

<sup>1</sup>Alcoholic drinks refer to standard drinks, which contain 10-12 grams of ethanol, e.g. 1.5 dL of wine or 3.3 dL of beer.

**Table S2.** Detailed cause of death of individuals who experienced a liver-related death

| Cause of Death                  | Abstaining  | Non-hazardous drinking | Hazardous drinking (no binge) | Binge drinking |
|---------------------------------|-------------|------------------------|-------------------------------|----------------|
| <b>Acute liver failure</b>      | 2 (11.1%)   | 1 (8.3%)               | 1 (20.0%)                     | 2 (100.0%)     |
| <b>Hepatocellular carcinoma</b> | 9 (50.0%)   | 6 (50.0%)              | 2 (40.0%)                     | 0              |
| <b>Hepatorenal syndrome</b>     | 2 (11.1%)   | 0                      | 0                             | 0              |
| <b>Liver cirrhosis</b>          | 2 (11.1%)   | 3 (25.0%)              | 2 (40.0%)                     | 0              |
| <b>Variceal bleeding</b>        | 1 (5.6%)    | 0                      | 0                             | 0              |
| <b>Viral hepatitis</b>          | 2 (11.1%)   | 2 (16.7%)              | 0                             | 0              |
| <b>Total</b>                    | 18 (100.0%) | 12 (100.0%)            | 5 (100.0%)                    | 2 (100.0%)     |

**Table S3.** Incidence rate ratios (IRR) of all-cause and liver-related deaths, by alcohol drinking pattern

| Alcohol drinking pattern             | All cause death          |                                                           |                                            | Liver-related death      |                                         |
|--------------------------------------|--------------------------|-----------------------------------------------------------|--------------------------------------------|--------------------------|-----------------------------------------|
|                                      | Univariable IRR (95% CI) | Time-varying model <sup>1</sup> IRR (95% CI) <sup>1</sup> | Time-fixed model <sup>2</sup> IRR (95% CI) | Univariable IRR (95% CI) | Multivariable IRR (95% CI) <sup>3</sup> |
| <b>Abstinence</b>                    | 2.5 (2.0 to 3.0)         | 1.9 (1.5 to 2.3)                                          | 1.4 (1.1 to 1.8)                           | 5.0 (2.3 to 11.0)        | 3.9 (1.7 to 9.1)                        |
| <b>Non-hazardous drinking</b>        | Ref.                     | Ref.                                                      | Ref.                                       | Ref.                     | Ref.                                    |
| <b>Hazardous drinking (no binge)</b> | 0.7 (0.5 to 1.0)         | 0.8 (0.6 to 1.1)                                          | 1.4 (1.0 to 1.8)                           | 1.8 (0.6 to 5.4)         | 1.9 (0.6 to 5.8)                        |
| <b>Binge drinking</b>                | 2.4 (1.7 to 3.4)         | 1.9 (1.3 to 2.7)                                          | 1.8 (1.2 to 2.7)                           | 4.1 (1.1 to 15.2)        | 3.6 (0.9 to 13.9)                       |

<sup>1</sup>The main exposure was the time-varying alcohol drinking pattern, and the analysis was adjusted for age, sex, ethnicity, HIV transmission group, nadir CD4 cell count, education, HBV and HCV co-infection, history of Aids defining disease, depressive episodes, employment status, partnership, smoking and illicit drug use. <sup>2</sup>The time-fixed model used each individual's most common alcohol drinking pattern as exposure and used the same covariates as the time-varying model. <sup>3</sup>Adjusted for age, sex, HBV and HCV coinfection. **CI** confidence interval, **HBV** hepatitis B virus, **HCV** hepatitis C virus. **CI** confidence interval, **HBV** hepatitis B virus, **HCV** hepatitis C virus, **CDC** center for disease control.

**Table S4.** Incidence rate ratios (IRR) for liver-related events, by alcohol drinking pattern

| Alcohol drinking pattern             | Univariable IRR (95% CI) | Time-varying model <sup>1</sup> IRR (95% CI) | Time-fixed model <sup>1</sup> IRR (95% CI) | Without HBV/HCV <sup>1</sup> IRR (95% CI) |
|--------------------------------------|--------------------------|----------------------------------------------|--------------------------------------------|-------------------------------------------|
| <b>Abstinence</b>                    | 1.9 (1.4 to 2.6)         | 1.3 (0.9 to 1.8)                             | 1.2 (0.8 to 1.7)                           | 1.4 (0.8 to 2.5)                          |
| <b>Non-hazardous drinking</b>        | Ref.                     | Ref.                                         | Ref.                                       | Ref.                                      |
| <b>Hazardous drinking (no binge)</b> | 1.4 (1.0 to 2.1)         | 1.3 (0.9 to 2.0)                             | 2.4 (1.7 to 3.4)                           | 1.7 (0.9 to 2.9)                          |
| <b>Binge drinking</b>                | 4.8 (3.2 to 7.1)         | 3.8 (2.4 to 5.8)                             | 2.8 (1.7 to 4.8)                           | 7.1 (4.0 to 12.6)                         |

<sup>1</sup>Adjusted for age, sex, ethnicity, transmission group, nadir CD4 cell count, education, HBV and HCV co-infection, history of Aids defining disease, BMI, smoking, depression, employment status, partnership and illicit drug use. **CI** confidence interval, **HBV** hepatitis B virus, **HCV** hepatitis C virus, **BMI** body mass index.

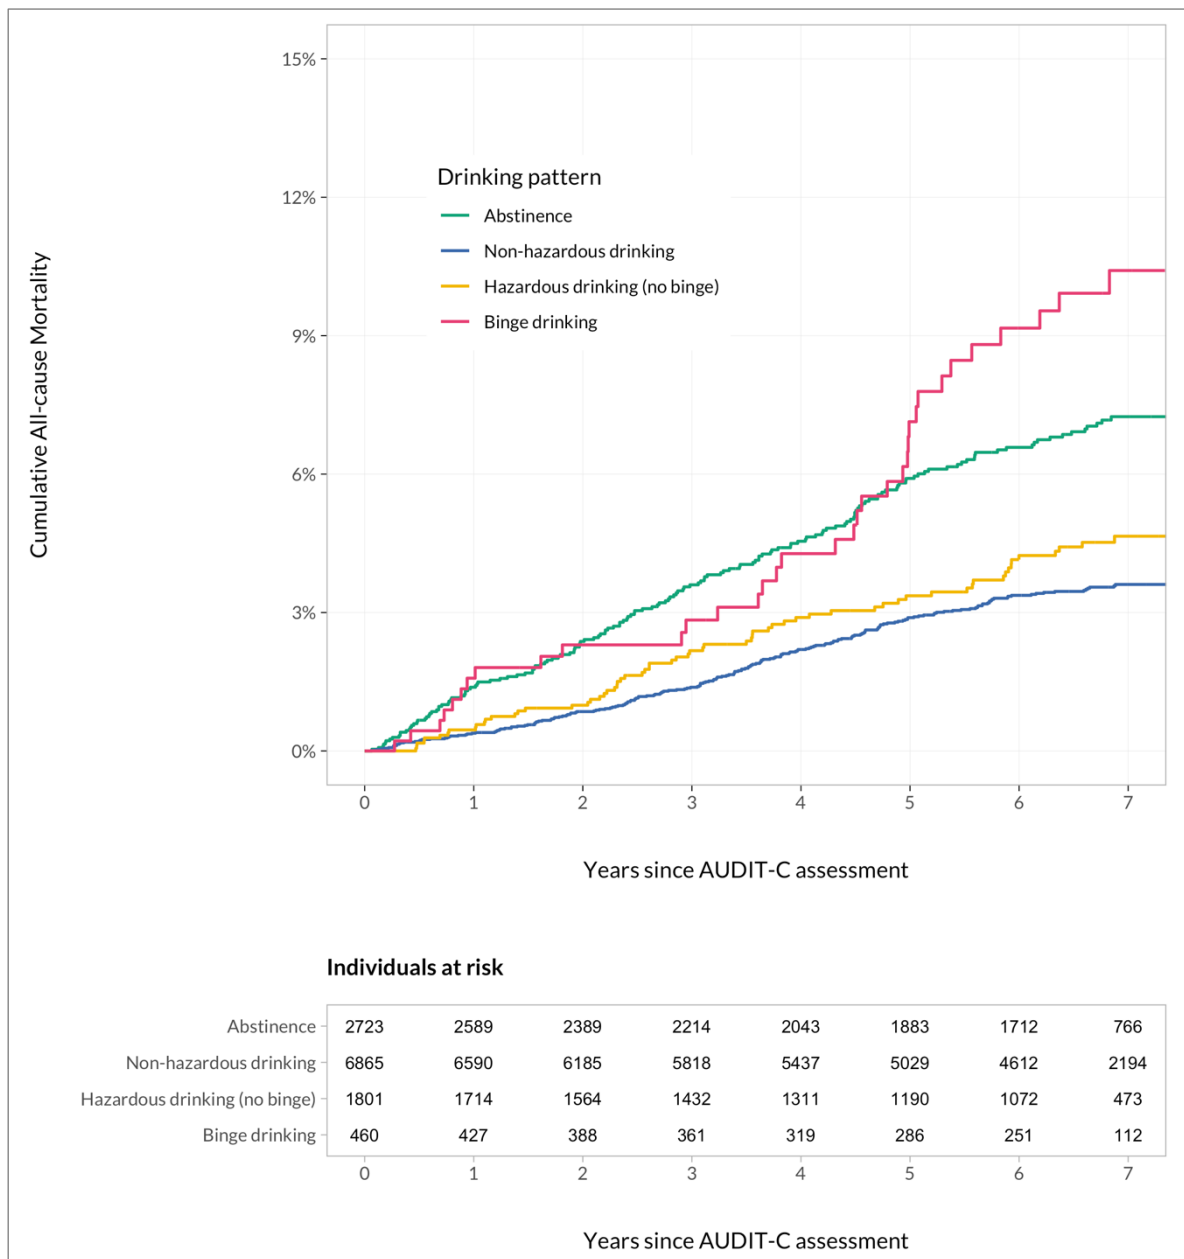

**Figure S1.** Kaplan Meier curves showing the time from the first AUDIT-C assessment to all-cause death, stratified by alcohol drinking pattern.

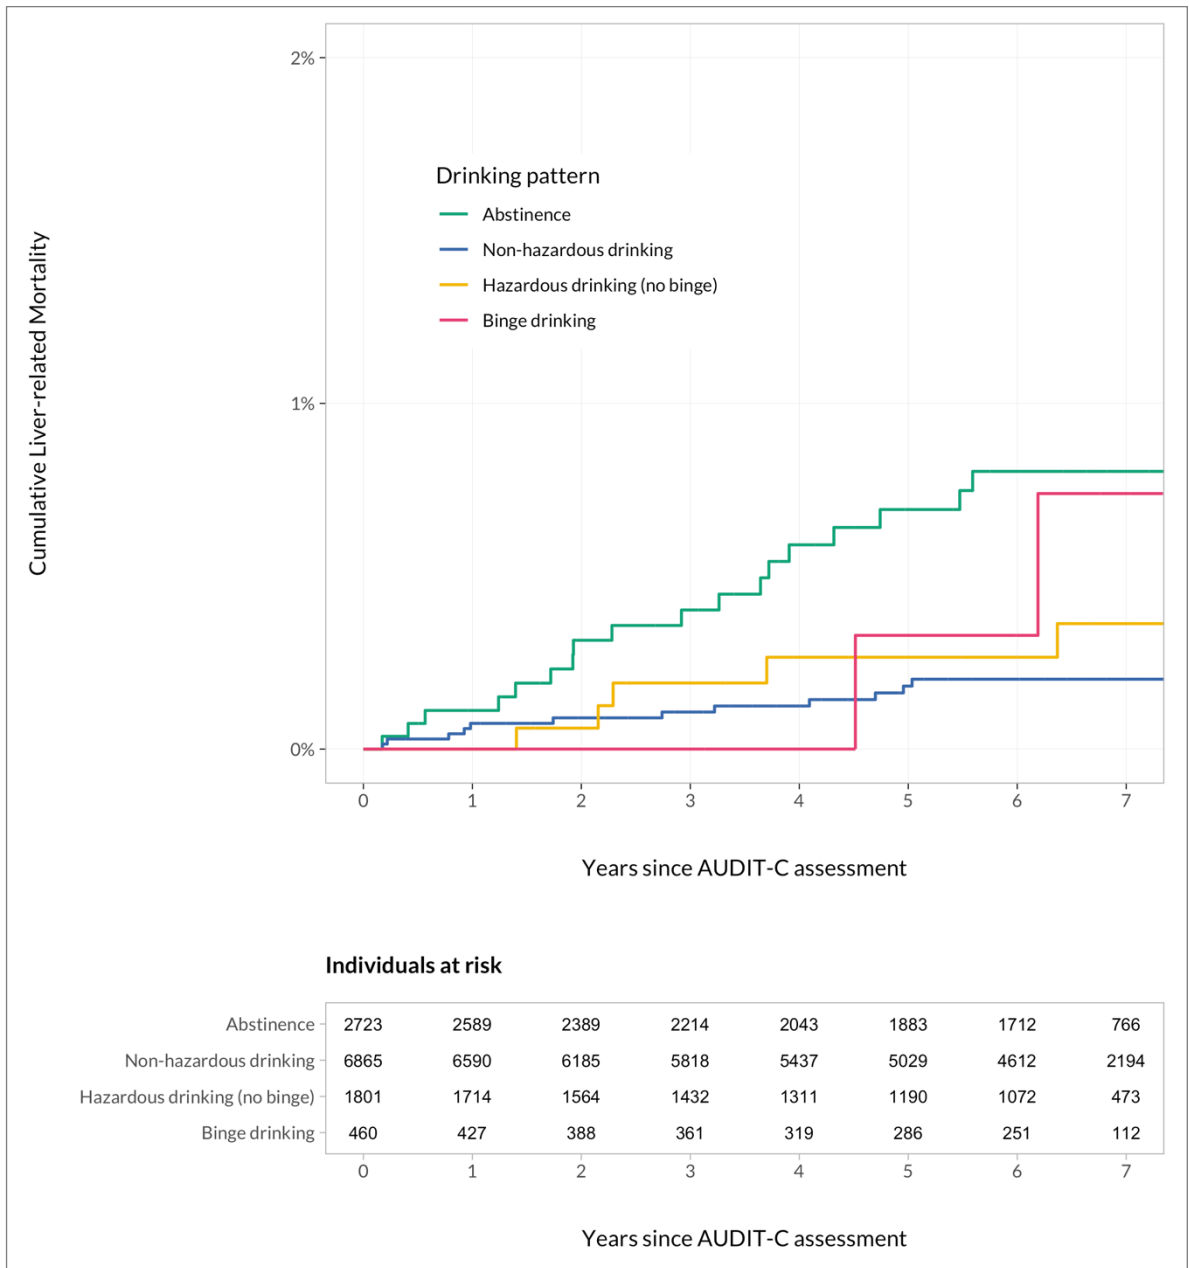

**Figure S2.** Kaplan Meier curves showing the time from the first AUDIT-C assessment to liver-related death, stratified by alcohol drinking pattern.

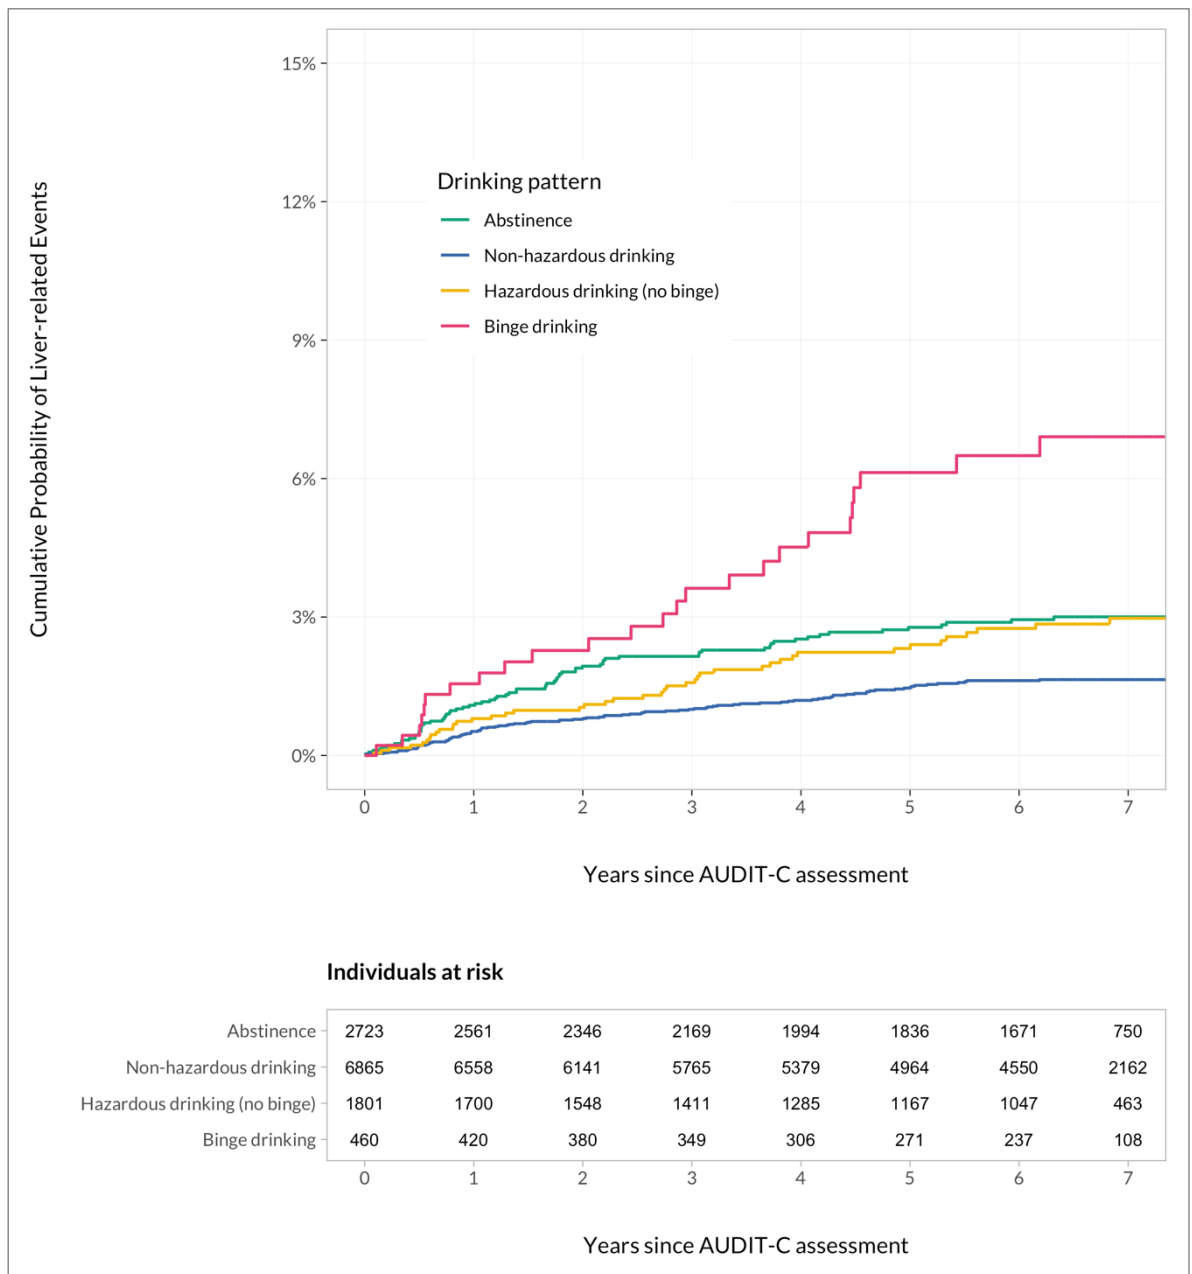

**Figure S3.** Kaplan Meier curves showing the time from the first AUDIT-C assessment to the first liver-related event, stratified by alcohol drinking pattern.

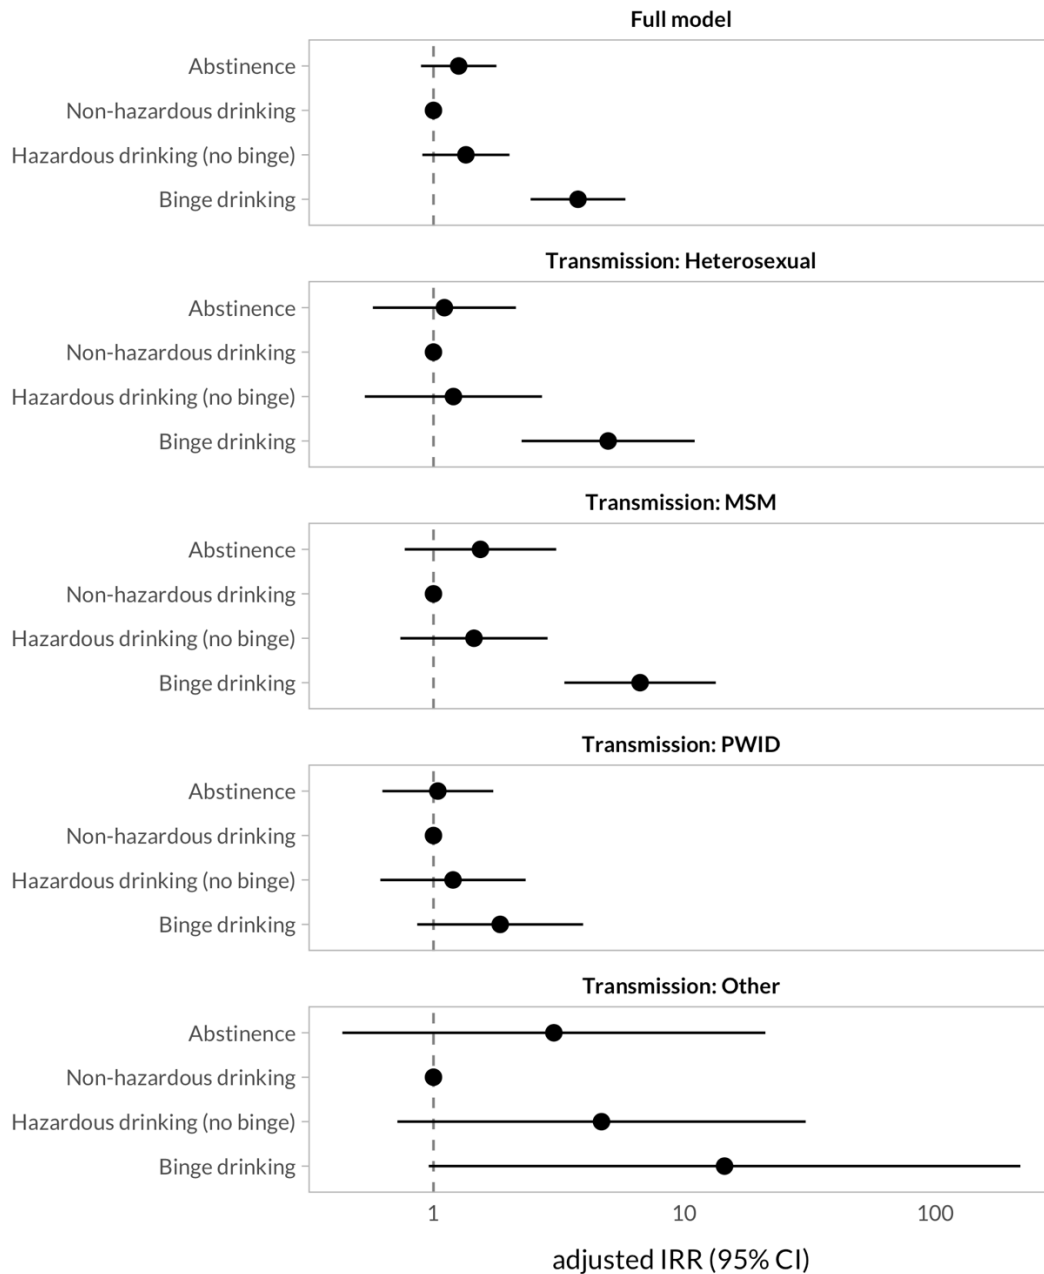

**Figure S4.** Subgroup analyses of the incidence rate ratios (IRR) for the occurrence of liver-related events by HIV transmission group. Whereas binge drinking was associated with the highest risk of liver-related events among heterosexual individuals and men who have sex with men (MSM), the impact was less pronounced among persons who inject drugs (PWID). Adjusted for age, sex, ethnicity, nadir CD4 cell count, education level, HBV and HCV coinfection, history of Aids defining disease, BMI, smoking, depression, employment status, partnership, and illicit drug use. HBV hepatitis B virus, HCV hepatitis C virus, CDC center for disease control.
